# Supplementary material
Source: PubMed Central journal article supplement (PMC3446671)
Supplement: mmc1.pdf [file mmc1.pdf]

**Protein-Protein Interactions in Calcium Transport Regulation Probed by Saturation  
Transfer Electron Paramagnetic Resonance**

**>>SUPPORTING MATERIAL<<**

Zachary M. James, Jesse E. McCaffrey, Kurt D. Torgersen, Christine B. Karim, and David D. Thomas

University of Minnesota, Minneapolis, MN 55455

| Sample       | $pK_{Ca}$       |
|--------------|-----------------|
| SERCA Only   | $6.48 \pm 0.02$ |
| PLB          | $5.96 \pm 0.01$ |
| pPLB         | $6.26 \pm 0.02$ |
| 36-TOAC-PLB  | $5.97 \pm 0.01$ |
| 36-TOAC-pPLB | $6.27 \pm 0.02$ |

**Table S1.**  $pK_{Ca}$  values from functional experiments shown in Fig. 3.

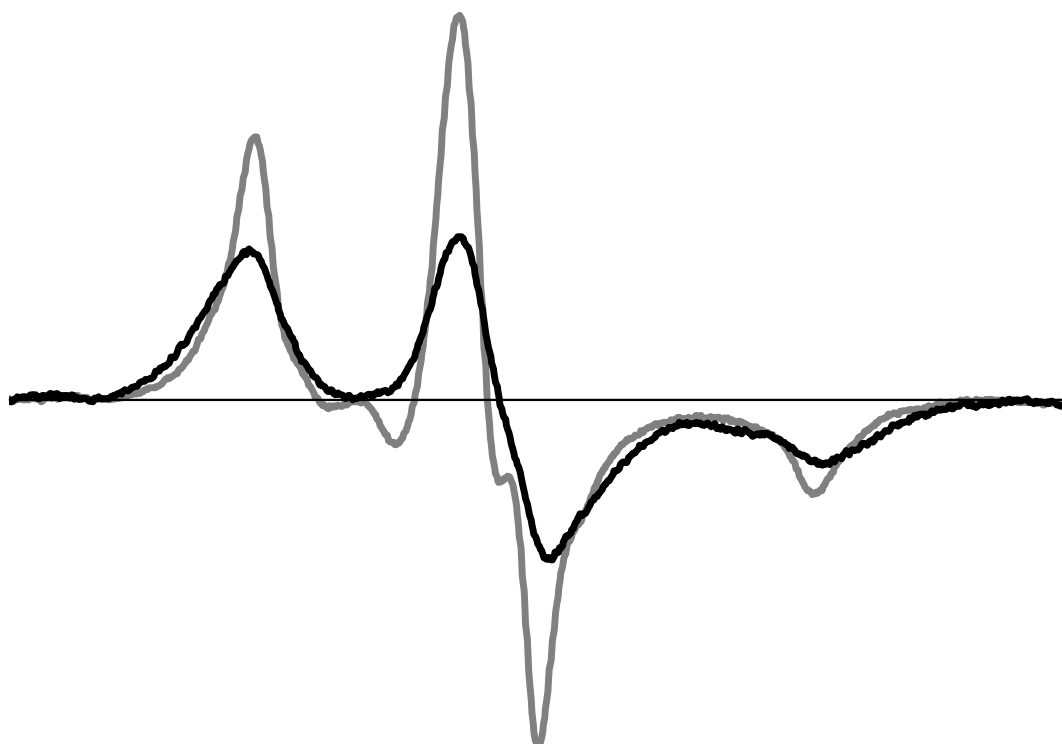

**Fig. S1.** Conventional EPR spectra of 36-TOAC PLB at 1000 L/P (gray, same conditions as in Fig. 4) and 20 L/P (black), showing greatly enhanced spin-spin interactions due to aggregation at 20 L/P.

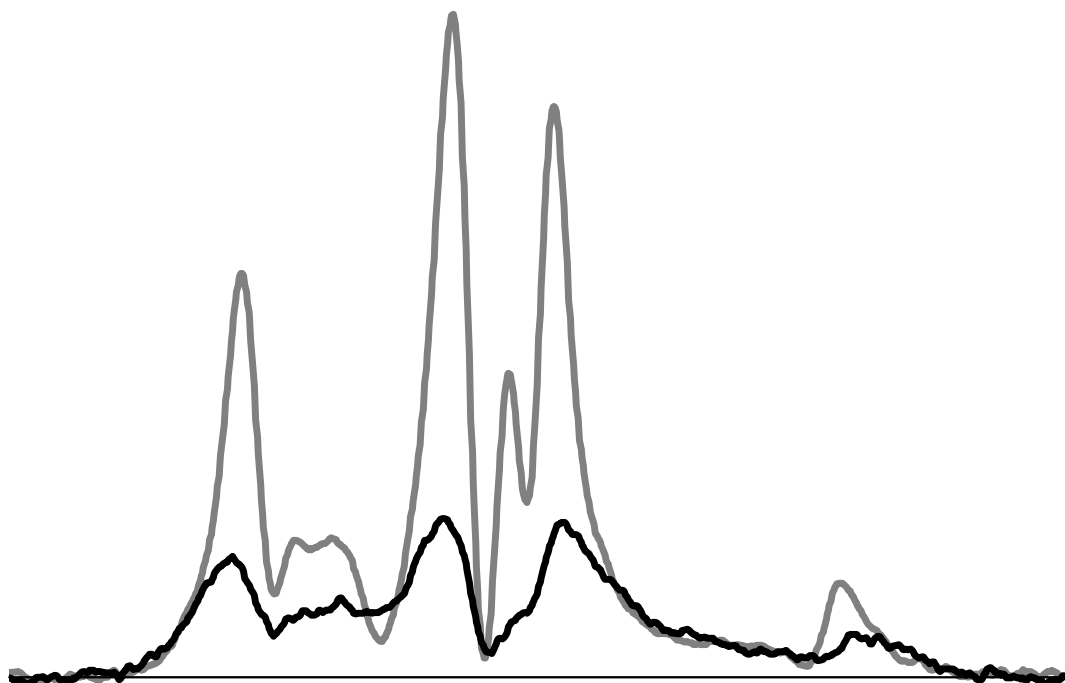

**Fig. S2.** STEPR spectra of 36-TOAC PLB at 1000 L/P (gray, same conditions as in Fig. 4) and 20 L/P (black). The black spectrum is strongly attenuated by spin-spin interactions (1), which are evident in the conventional EPR spectra of Fig. S1. Thus STEPR is quite sensitive to self-aggregation of this protein, which does not occur above 600 L/P.

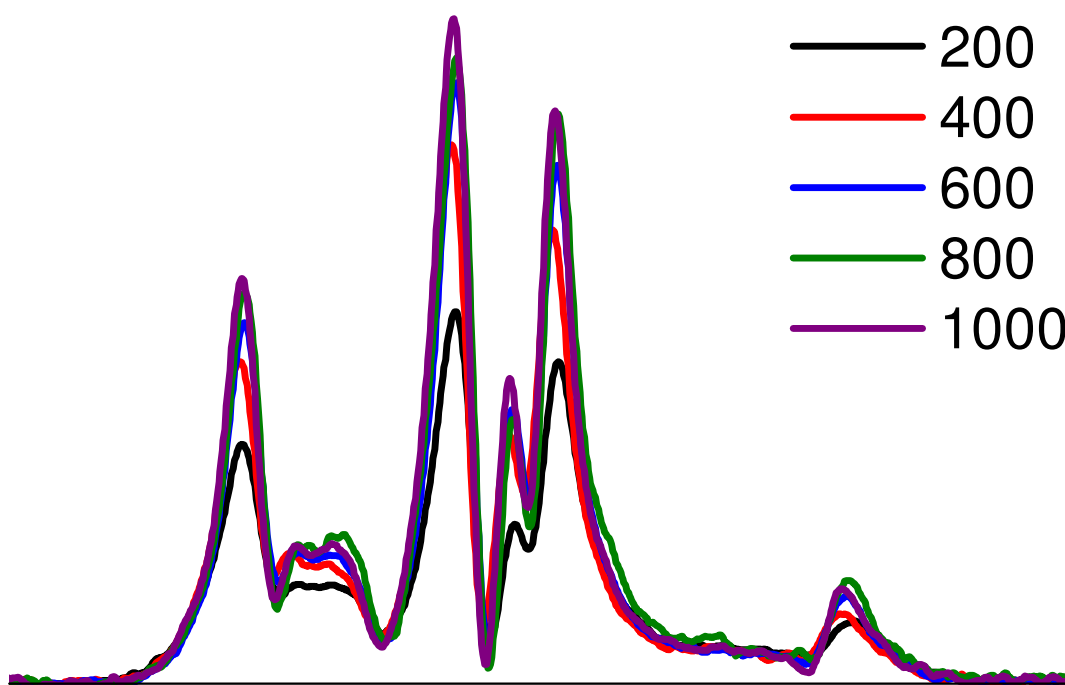

**Fig. S3.** STEPR spectra of 36-TOAC-PLB as a function of L/P (see figure legend), corresponding to the same samples as in Fig. 4. The increase in spectral intensity with increasing L/P (leveling off at high L/P) is consistent with decreasing spin-spin interactions (1), as documented in Fig. 4. STEPR lineshapes are essentially invariant above 600 L/P, supporting the conclusion that AFA-PLB is monomeric.

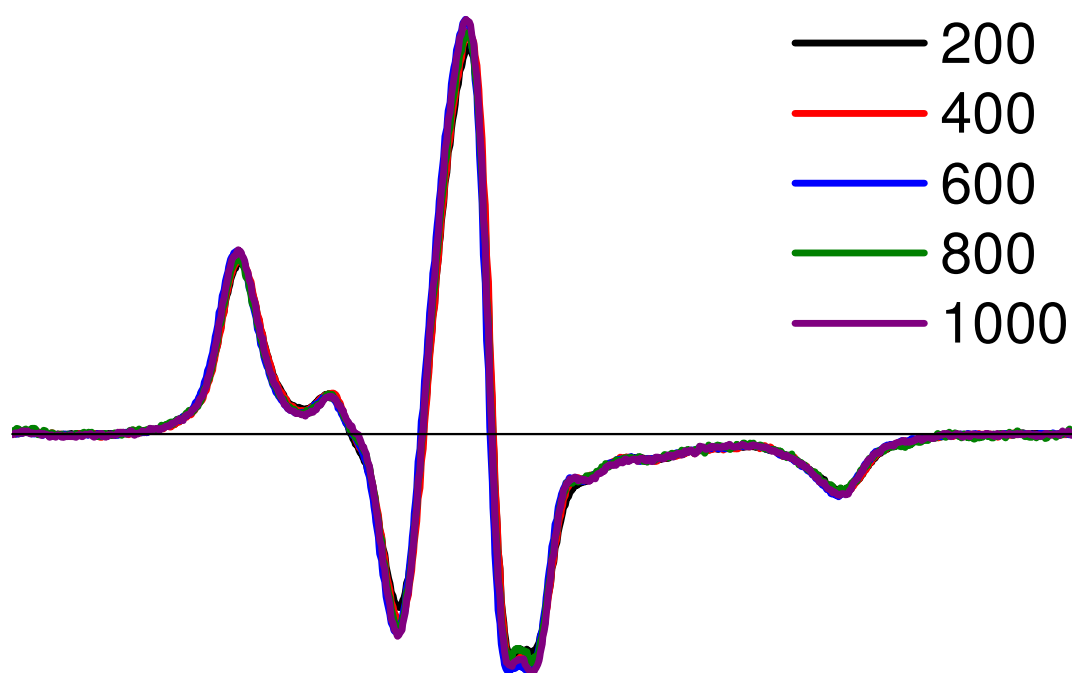

**Fig. S4.** Conventional EPR spectra of MSL-SERCA as a function of L/P, corresponding to the data shown in Fig. 5. The invariant spectra show that there are no significant changes in nanosecond rotational motion or spin-spin interactions due to variation of L/P, so all changes in STEPR spectra (Fig. 5) are due to  $\mu$ s rotational diffusion of SERCA. Average  $2T_{\parallel}' = 68.2$  G.

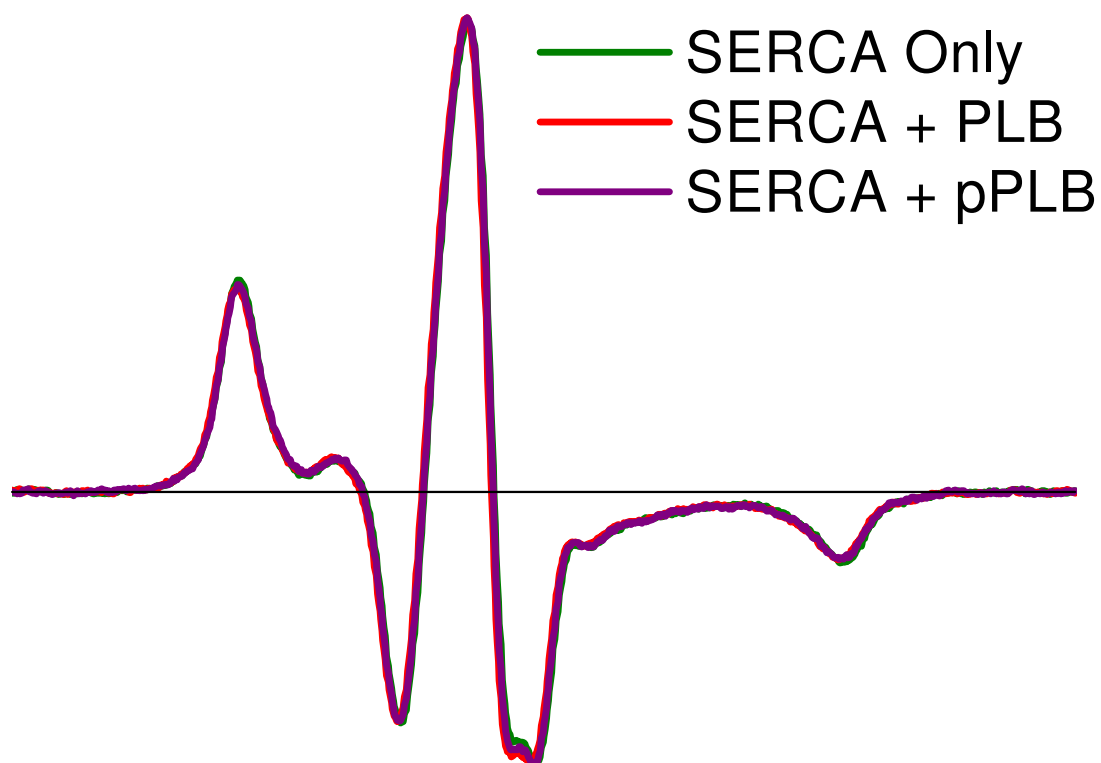

**Fig. S5.** Conventional EPR of MSL-SERCA reconstituted with unlabeled PLB, corresponding to the data shown in Fig. 7. The invariant spectra show that there are no significant changes in nanosecond rotational motion or spin-spin interactions due to PLB binding or phosphorylation, so STEPR spectra (Fig. 7) report microsecond rotational diffusion of SERCA.

## Supporting References

1. Horvath, L. I., L. Dux, H. O. Hankovszky, K. Hideg, and D. Marsh. 1990. Saturation transfer electron spin resonance of Ca<sup>2+</sup>-ATPase covalently spin-labeled with beta-substituted vinyl ketone- and maleimide-nitroxide derivatives. Effects of segmental motion and labeling levels. *Biophys J* 58:231-241.
